# Supplementary material for: Oxidative Stress Resistance in Metastatic Prostate Cancer: Renewal by Self-Eating
Source: PubMed Central journal article supplement (PMC4679176; doi:10.1371/journal.pone.0145016), 2015-12-15
Supplement: pone.0145016.s002.pdf [file pone.0145016.s002.pdf]

# Flow-cytometric analysis - raw data and gating strategy

## Gating strategy

In all flow cytometric gating strategies we used defined range (RN1) for debris elimination.

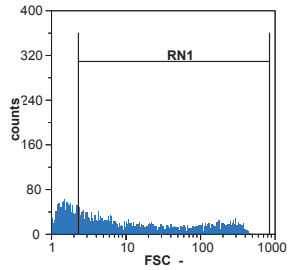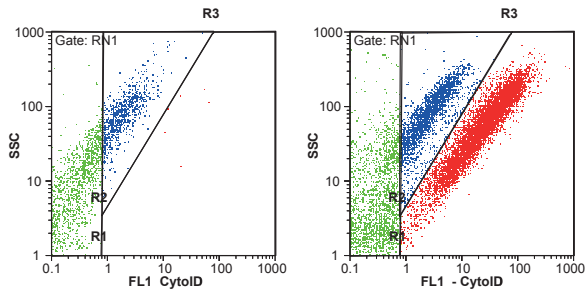

The CytolD autophagy detection kit is based on the determination of cells positive for the presence of acidic organelles co-localized with LC-3b protein. For negative control we used bafilomycin A1 treated cells. Bafilomycin A1 prevents organelles acidification by inhibiting vacuolar H<sup>+</sup> ATPase. CytolD positive cells were divided into two populations, based on the signal strength (red cluster depicts CYTO-ID++ population, blue cluster Cyto-ID+ population). Weak Cyto-ID-positivity is presented even after Bafilomycin A1 treatment due to residual activity of acidic organelles (blue cluster).

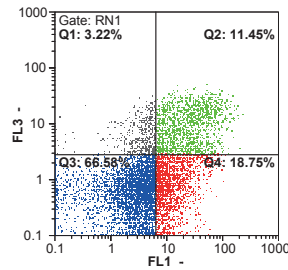

For the determination of “normal” (“healthy”), “early apoptotic”, “late apoptotic/necrotic” cells and “cellular fragments”, classical four quadrant gating strategy was performed.

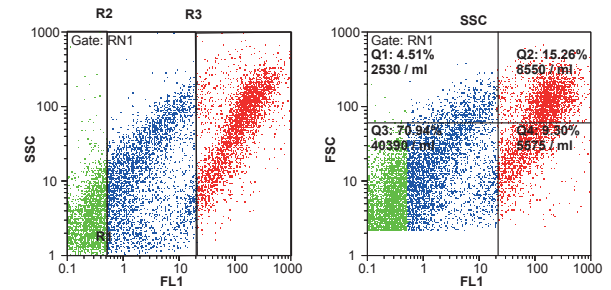

For the determination of large, SYTO16 highly positive cells, two gating strategies were applied. In first strategy (SSC/-FL1), cells were divided into three population according their positivity for SYTO 16 staining (negative/slightly positive/highly positive), and granularity. After that, second gating strategy (FSC/FL1) was performed for determining of SYTO16 positive-large sized population of cells.

Negative control - Bafilomycin treatment

File: autof\_BAFILOMYCIN.FCS Date: 20-02-2015 Time: 13:06:37 Particles: 5000 Acq.-Time: 178 s partec PAS

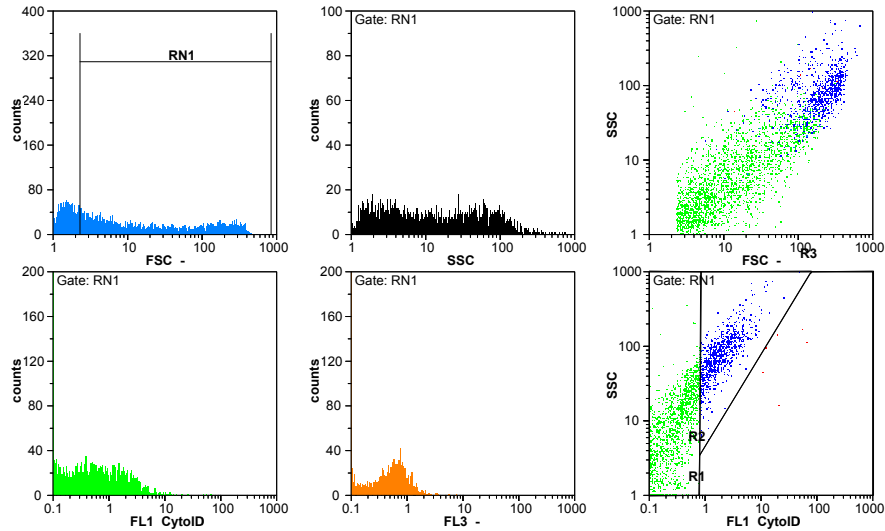

R3: 0.14%    R1: 82.16%    R2: 17.90%

| Region | Gate   | Count | Count/ml | %Gated | Mean-x | CV-x%  | Mean-y | CV-y%  |
|--------|--------|-------|----------|--------|--------|--------|--------|--------|
| R1     | RN1    | 2644  | -        | 74.77  | 0.23   | 85.30  | 9.61   | 228.67 |
| R2     | RN1    | 895   | -        | 25.31  | 2.38   | 104.83 | 96.08  | 88.62  |
| RN1    | <None> | 3536  | -        | 70.72  | 72.40  | 144.55 | -      | -      |
| R3     | RN1    | 7     | -        | 0.20   | 28.07  | 82.87  | 93.25  | 57.35  |

timepoint 0 h plumbagin treatment

File: X0h\_cytoID\_at\_030.FCS Date: 11-11-2014 Time: 11:57:36 Particles: 20000 Acq.-Time: 249 s partec PAS

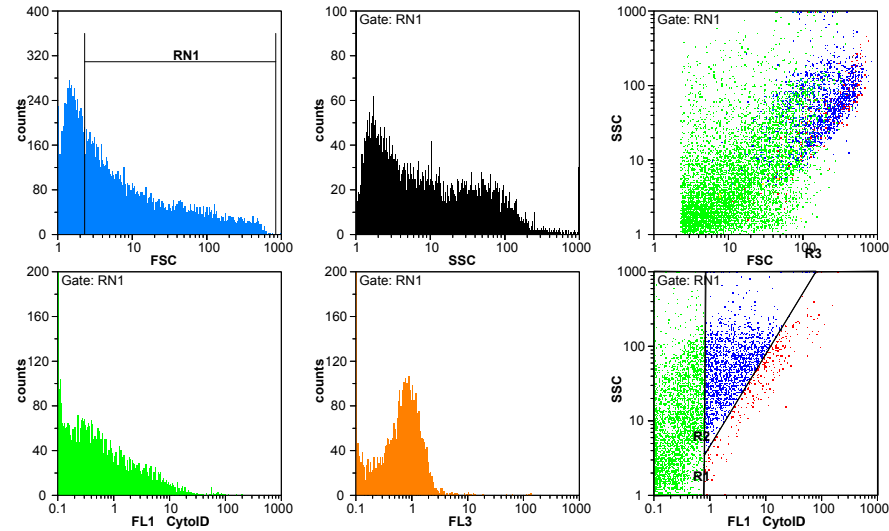

R3: 1.27%    R1: 90.80%    R2: 7.96%

| Region | Gate   | Count | Count/ml | %Gated | Mean-x | CV-x%  | Mean-y | CV-y%  |
|--------|--------|-------|----------|--------|--------|--------|--------|--------|
| R1     | RN1    | 11350 | -        | 86.06  | 0.17   | 88.70  | 12.77  | 401.06 |
| R2     | RN1    | 1592  | -        | 12.07  | 3.37   | 135.71 | 83.47  | 144.03 |
| RN1    | <None> | 13188 | -        | 65.94  | 49.93  | 197.39 | -      | -      |
| R3     | RN1    | 252   | -        | 1.91   | 17.80  | 152.02 | 78.89  | 173.28 |

timepoint 40 min plumbagin treatment

File: X40 min\_008\_50f.FCS Date: 03-11-2014 Time: 10:37:35 Particles: 20000 Acq.-Time: 65 s partec PAS

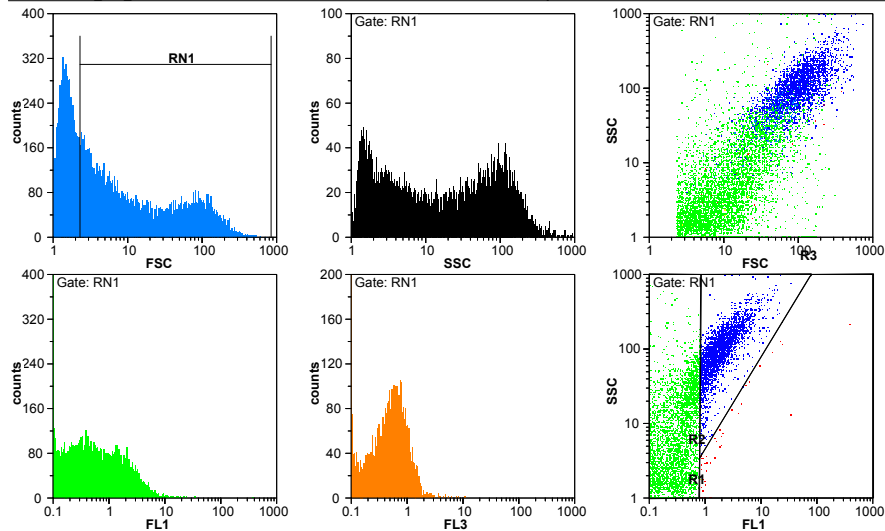

R3: 0.34%    R1: 83.52%    R2: 16.35%

| Region | Gate   | Count | Count/ml | %Gated | Mean-x | CV-x%  | Mean-y | CV-y%  |
|--------|--------|-------|----------|--------|--------|--------|--------|--------|
| R1     | RN1    | 9472  | -        | 74.28  | 0.24   | 81.16  | 11.65  | 460.03 |
| R2     | RN1    | 3269  | -        | 25.64  | 2.35   | 87.47  | 118.46 | 80.37  |
| RN1    | <None> | 12752 | -        | 63.76  | 40.77  | 154.04 | -      | -      |
| R3     | RN1    | 49    | -        | 0.38   | 11.34  | 477.38 | 17.28  | 228.27 |

timepoint 90 min plumbagin treatment

File: X1.5\_Cyto\_50f2.FCS Date: 03-11-2014 Time: 11:21:16 Particles: 20000 Acq.-Time: 12 s partec PAS

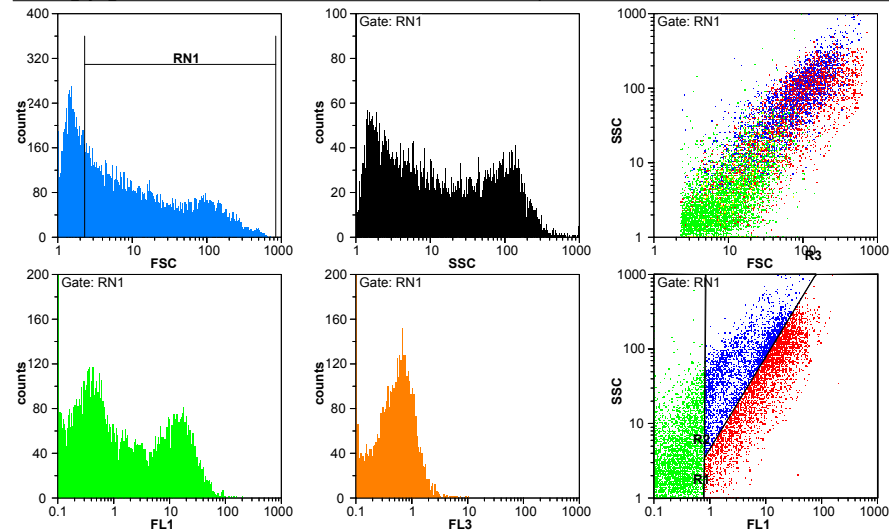

R3: 16.59%    R1: 71.09%    R2: 12.31%

| Region | Gate   | Count | Count/ml | %Gated | Mean-x | CV-x%  | Mean-y | CV-y%  |
|--------|--------|-------|----------|--------|--------|--------|--------|--------|
| R1     | RN1    | 8212  | -        | 59.04  | 0.25   | 76.91  | 4.99   | 409.89 |
| R2     | RN1    | 2447  | -        | 17.59  | 6.24   | 101.53 | 97.73  | 108.80 |
| RN1    | <None> | 13909 | -        | 69.55  | 49.63  | 170.66 | -      | -      |
| R3     | RN1    | 3237  | -        | 23.27  | 15.56  | 100.71 | 68.60  | 107.58 |

timepoint 4 h plumbagin treatment

File: X4h\_cytolD\_50f\_2.FCS Date: 03-11-2014 Time: 13:29:57 Particles: 20000 Acq-Time: 20 s Concentration: 53650 / ml partec PAS

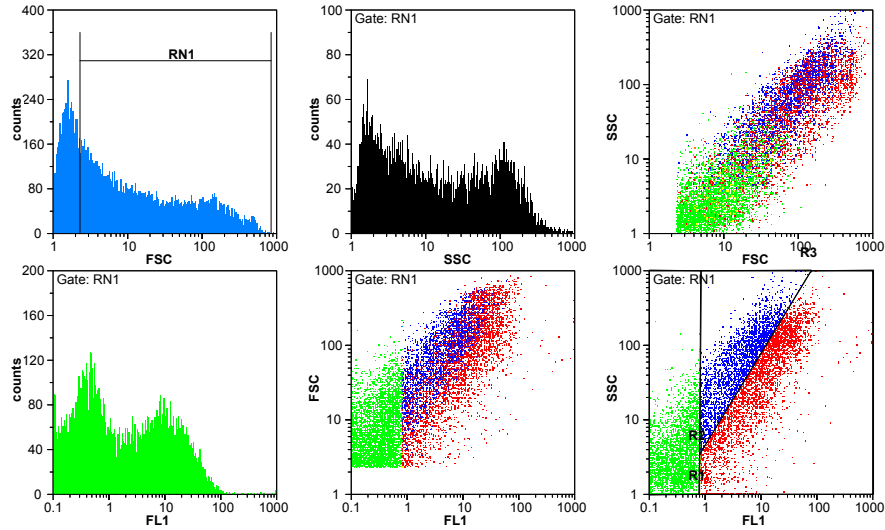

R3: 19.98%    R1: 66.61%    R2: 13.50%

| Region | Gate   | Count | Count/ml | %Gated | Mean-x | CV-x%  | Mean-y | CV-y%  |
|--------|--------|-------|----------|--------|--------|--------|--------|--------|
| R1     | RN1    | 7464  | 18620    | 53.38  | 0.27   | 74.23  | 3.61   | 187.82 |
| R2     | RN1    | 2696  | 7775     | 19.28  | 6.30   | 100.53 | 98.74  | 113.48 |
| RN1    | <None> | 13984 | 38055    | 69.92  | 61.87  | 171.25 | -      | -      |
| R3     | RN1    | 3831  | 11685    | 27.40  | 19.17  | 234.11 | 65.22  | 122.52 |

timepoint 6 h plumbagin treatment

File: X6h\_Cyto\_1.FCS Date: 03-11-2014 Time: 15:34:38 Particles: 20000 Acq-Time: 7 s partec PAS

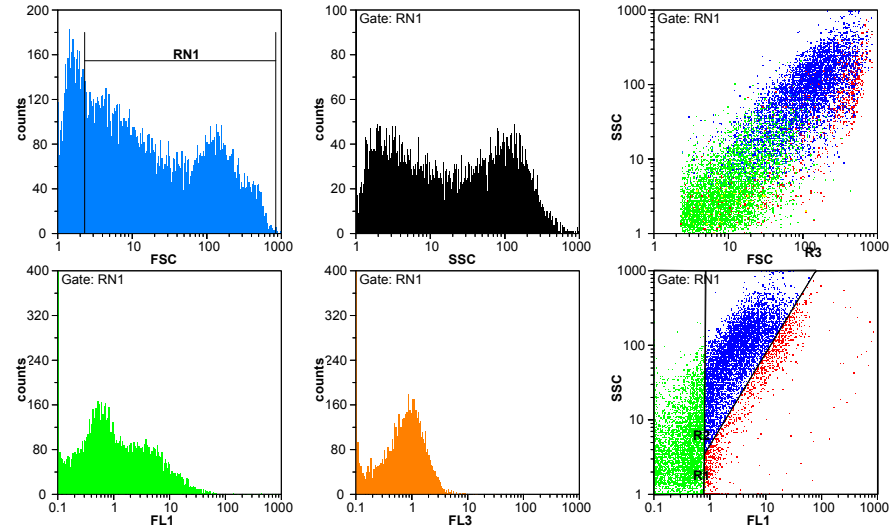

R3: 6.03%    R1: 65.80%    R2: 28.57%

| Region | Gate   | Count | Count/ml | %Gated | Mean-x | CV-x%  | Mean-y | CV-y%  |
|--------|--------|-------|----------|--------|--------|--------|--------|--------|
| R1     | RN1    | 8997  | -        | 57.20  | 0.31   | 73.35  | 5.49   | 183.31 |
| R2     | RN1    | 5708  | -        | 36.29  | 4.43   | 101.74 | 115.34 | 96.91  |
| RN1    | <None> | 15729 | -        | 78.64  | 78.51  | 156.21 | -      | -      |
| R3     | RN1    | 1085  | -        | 6.90   | 18.58  | 336.19 | 61.26  | 147.29 |

timepoint 8 h plumbagin treatment

File: X8hod Au\_007.FCS Date: 20-05-2014 Time: 16:18:44 Particles: 20000 Acq-Time: 71 s partec PAS

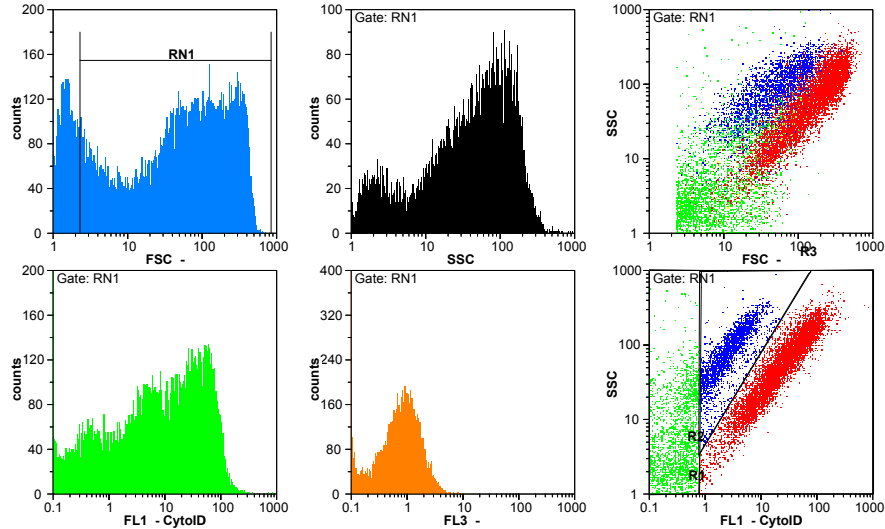

R3: 46.02%    R1: 39.24%    R2: 14.90%

| Region | Gate   | Count | Count/ml | %Gated | Mean-x | CV-x%  | Mean-y | CV-y%  |
|--------|--------|-------|----------|--------|--------|--------|--------|--------|
| R1     | RN1    | 4476  | -        | 26.97  | 0.27   | 78.30  | 10.83  | 408.57 |
| R2     | RN1    | 2979  | -        | 17.95  | 3.43   | 79.99  | 100.15 | 75.74  |
| RN1    | <None> | 16596 | -        | 82.98  | 115.02 | 106.36 | -      | -      |
| R3     | RN1    | 9166  | -        | 55.23  | 36.72  | 96.77  | 77.21  | 85.82  |

timepoint 10 h plumbagin treatment

File: X10h\_Cyto\_004.FCS Date: 03-11-2014 Time: 19:36:39 Particles: 20000 Acq-Time: 88 s partec PAS

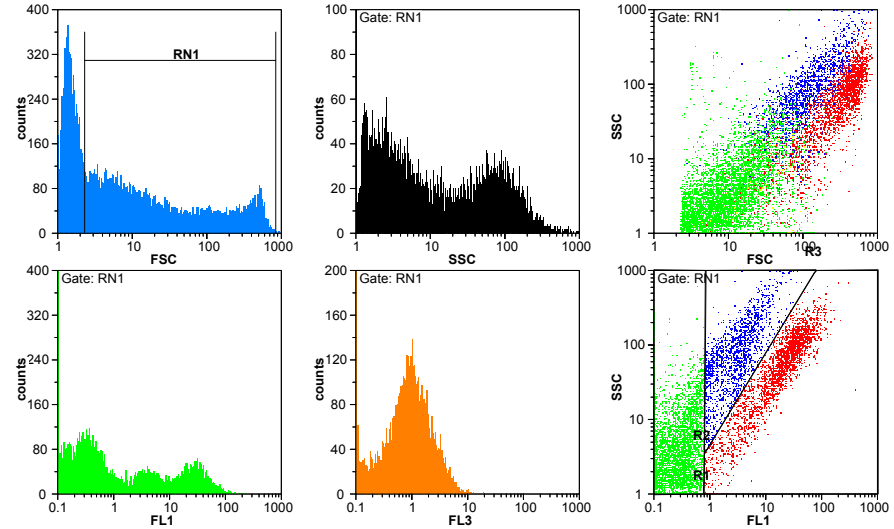

R3: 13.82%    R1: 78.25%    R2: 8.01%

| Region | Gate   | Count | Count/ml | %Gated | Mean-x | CV-x%  | Mean-y | CV-y%  |
|--------|--------|-------|----------|--------|--------|--------|--------|--------|
| R1     | RN1    | 8410  | -        | 66.05  | 0.23   | 76.53  | 5.59   | 340.10 |
| R2     | RN1    | 1600  | -        | 12.57  | 4.10   | 100.26 | 119.79 | 118.10 |
| RN1    | <None> | 12733 | -        | 63.66  | 97.81  | 165.60 | -      | -      |
| R3     | RN1    | 2736  | -        | 21.49  | 27.06  | 91.51  | 76.28  | 92.08  |

timepoint 16 h plumbagin treatment

timepoint 20 h plumbagin treatment

File: X16h\_Cyto\_001.FCS Date: 04-11-2014 Time: 10:57:06 Particles: 20000 Acq.-Time: 208 s Concentration: 36965 / ml partec PAS

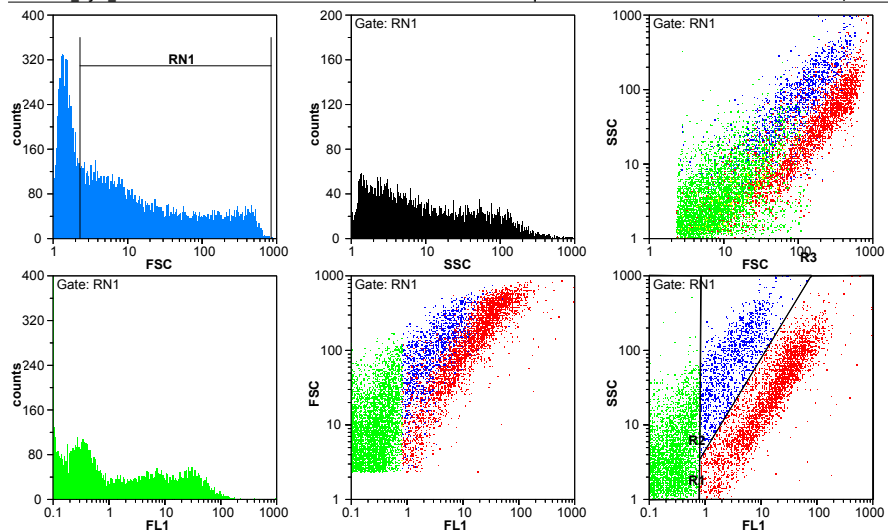

R3: 18.24%    R1: 75.41%    R2: 6.43%

| Region | Gate   | Count | Count/ml | %Gated | Mean-x | CV-x%  | Mean-y | CV-y%  |
|--------|--------|-------|----------|--------|--------|--------|--------|--------|
| R1     | RN1    | 8159  | 16550    | 62.59  | 0.22   | 77.39  | 4.76   | 225.12 |
| R2     | RN1    | 1281  | 2150     | 9.83   | 4.40   | 105.55 | 113.80 | 114.86 |
| RN1    | <None> | 13035 | 24100    | 65.17  | 77.69  | 172.12 | -      | -      |
| R3     | RN1    | 3605  | 5450     | 27.66  | 26.59  | 167.40 | 48.74  | 135.18 |

File: X20h\_Cyto\_002.FCS Date: 04-11-2014 Time: 12:09:22 Particles: 20000 Acq.-Time: 44 s Concentration: 36965 / ml partec PAS

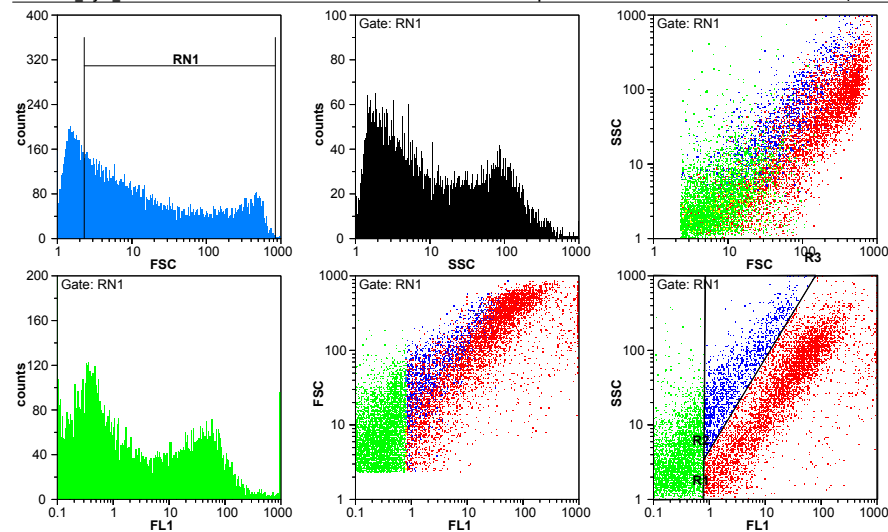

R3: 29.05%    R1: 64.33%    R2: 6.78%

| Region | Gate   | Count | Count/ml | %Gated | Mean-x | CV-x%  | Mean-y | CV-y%  |
|--------|--------|-------|----------|--------|--------|--------|--------|--------|
| R1     | RN1    | 8069  | -        | 53.52  | 0.26   | 75.58  | 4.93   | 421.28 |
| R2     | RN1    | 1345  | -        | 8.92   | 5.46   | 140.75 | 92.29  | 153.56 |
| RN1    | <None> | 15076 | -        | 75.38  | 95.04  | 186.10 | -      | -      |
| R3     | RN1    | 5687  | -        | 37.72  | 70.38  | 226.21 | 66.07  | 134.35 |

timepoint 24 h plumbagin treatment

timepoint 36 h plumbagin treatment

File: X24h\_Cyto\_003.FCS Date: 04-11-2014 Time: 09:45:25 Particles: 20000 Acq.-Time: 94 s Concentration: 74195 / ml partec PAS

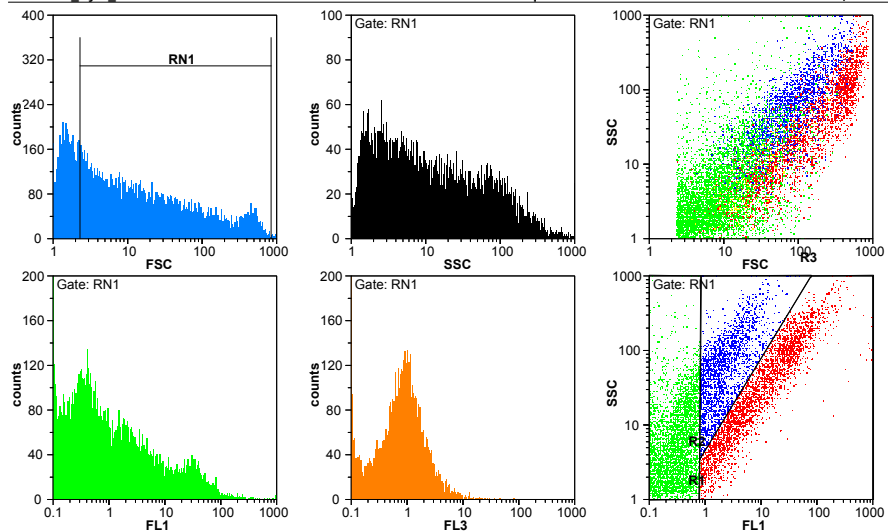

R3: 16.05%    R1: 73.60%    R2: 10.49%

| Region | Gate   | Count | Count/ml | %Gated | Mean-x | CV-x%  | Mean-y | CV-y%  |
|--------|--------|-------|----------|--------|--------|--------|--------|--------|
| R1     | RN1    | 9595  | 34990    | 64.67  | 0.24   | 80.05  | 11.00  | 460.82 |
| R2     | RN1    | 2098  | 7420     | 14.14  | 3.10   | 112.92 | 96.97  | 129.20 |
| RN1    | <None> | 14837 | 55060    | 74.19  | 73.77  | 185.21 | -      | -      |
| R3     | RN1    | 3169  | 12720    | 21.36  | 25.39  | 236.77 | 67.15  | 149.29 |

File: X36h\_Cyto\_001.FCS Date: 04-11-2014 Time: 21:49:39 Particles: 20000 Acq.-Time: 27 s Concentration: 74195 / ml partec PAS

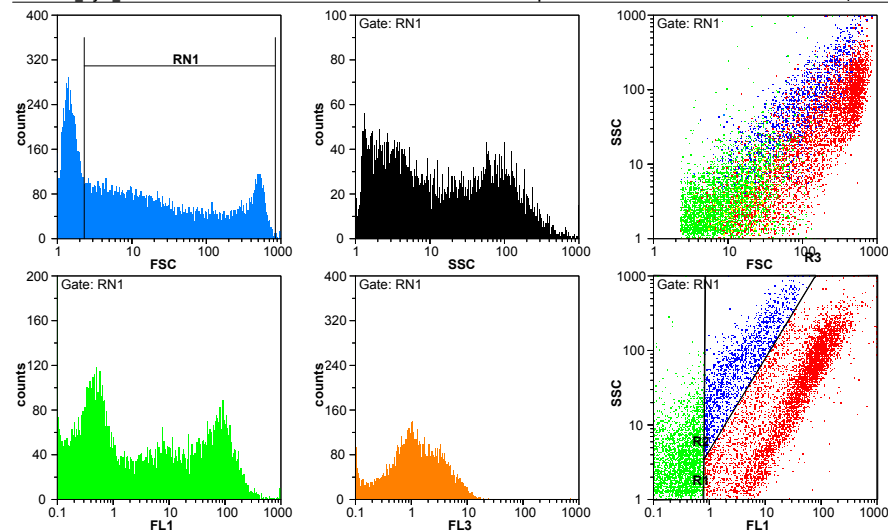

R3: 30.40%    R1: 62.78%    R2: 7.12%

| Region | Gate   | Count | Count/ml | %Gated | Mean-x | CV-x%  | Mean-y | CV-y%  |
|--------|--------|-------|----------|--------|--------|--------|--------|--------|
| R1     | RN1    | 6949  | -        | 49.34  | 0.28   | 74.51  | 5.11   | 611.88 |
| R2     | RN1    | 1420  | -        | 10.08  | 6.19   | 120.15 | 119.46 | 128.91 |
| RN1    | <None> | 14085 | -        | 70.42  | 123.54 | 149.64 | -      | -      |
| R3     | RN1    | 5749  | -        | 40.82  | 61.88  | 136.41 | 62.82  | 137.64 |

timepoint 48 h plumbagin treatment

File: X48h\_Cyto\_001.FCS Date: 05-11-2014 Time: 10:00:12 Particles: 20000 Acq.-Time: 36 s Concentration: 84195 / ml partec PAS

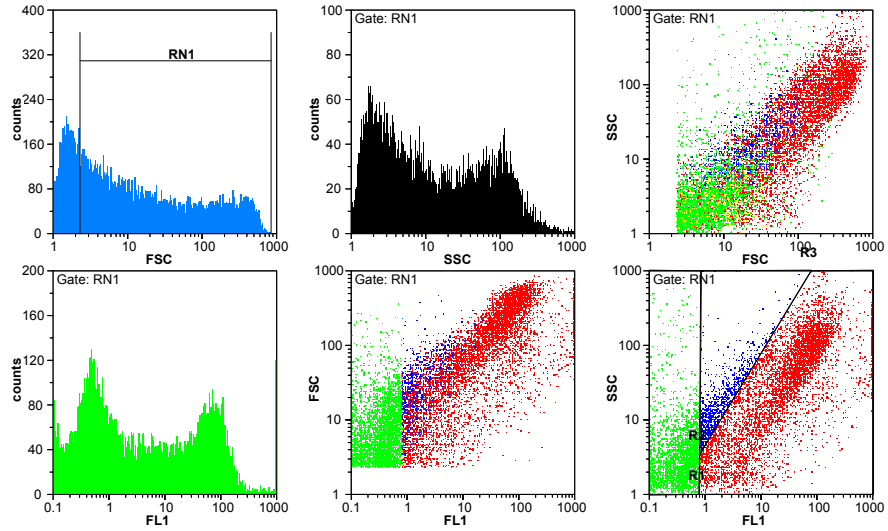

■ R3: 37.98%   
 ■ R1: 56.73%   
 ■ R2: 5.44%

| Region | Gate   | Count | Count/ml | %Gated | Mean-x | CV-x%  | Mean-y | CV-y%  |
|--------|--------|-------|----------|--------|--------|--------|--------|--------|
| R1     | RN1    | 6684  | 27695    | 44.56  | 0.30   | 72.29  | 10.05  | 570.35 |
| R2     | RN1    | 1080  | 4585     | 7.20   | 2.70   | 140.16 | 33.57  | 244.18 |
| RN1    | <None> | 15000 | 63350    | 75.00  | 84.84  | 161.80 | -      | -      |
| R3     | RN1    | 7253  | 31130    | 48.35  | 68.81  | 213.89 | 63.31  | 139.45 |

timepoint 0 h plumbagin treatment

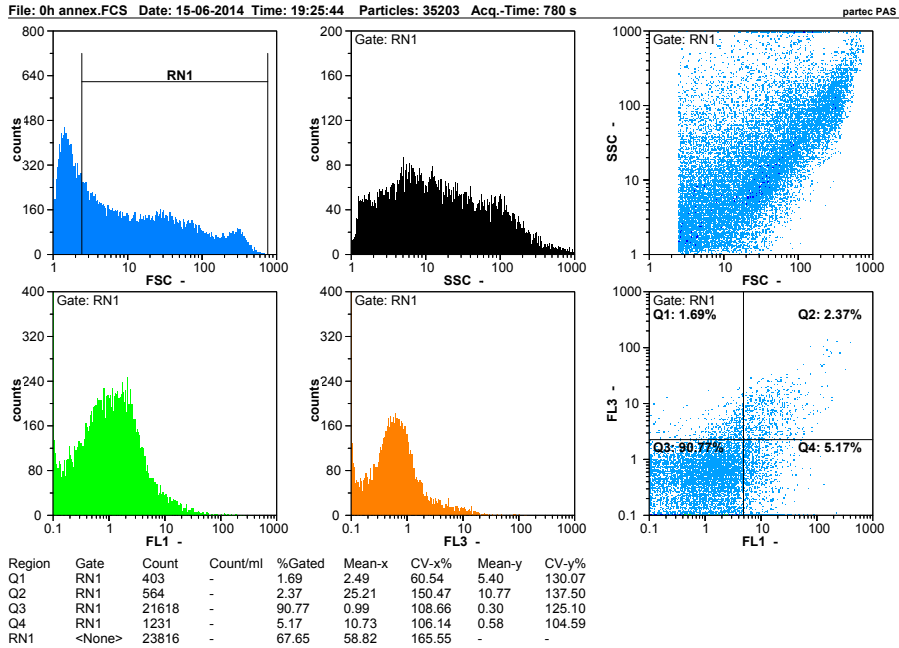

timepoint 20 min plumbagin treatment

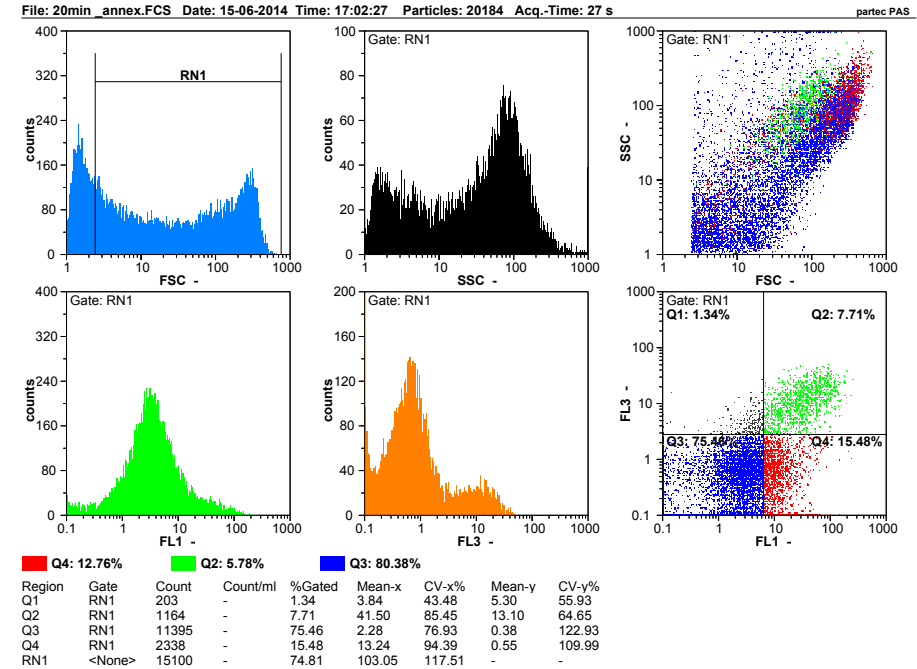

timepoint 40 min plumbagin treatment

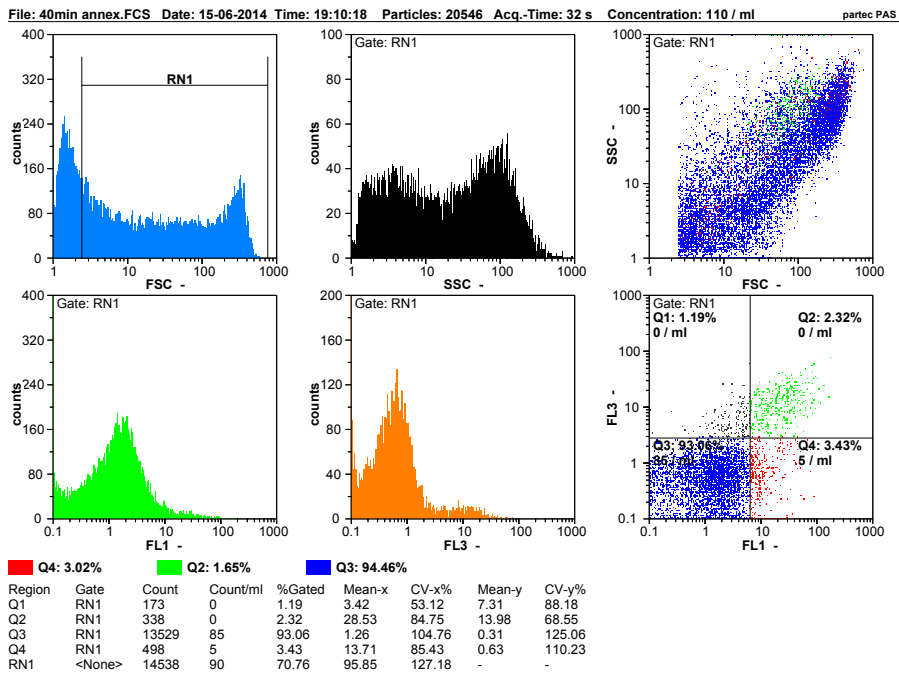

timepoint 90 min plumbagin treatment

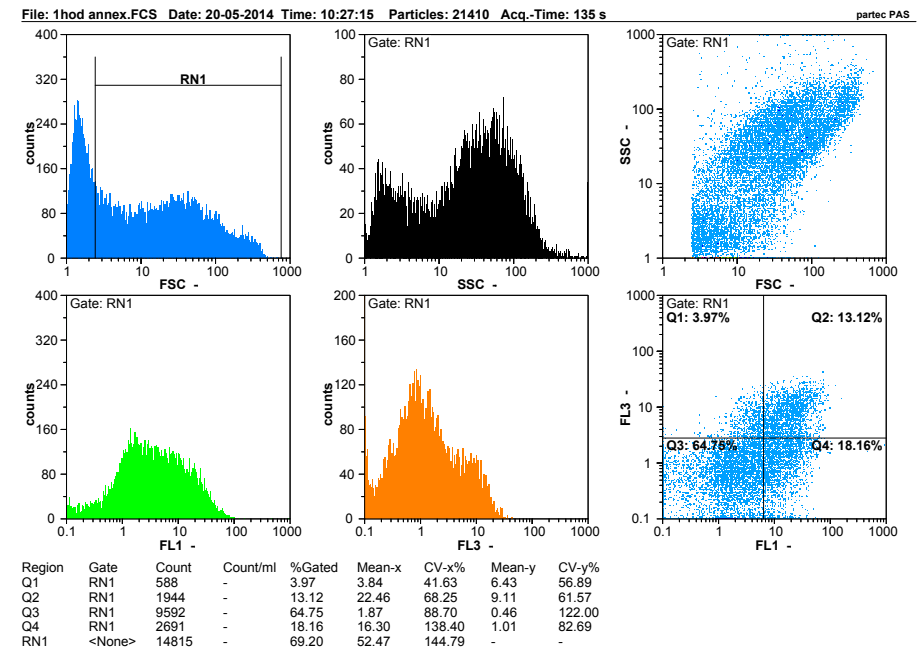

timepoint 0 h plumbagin treatment

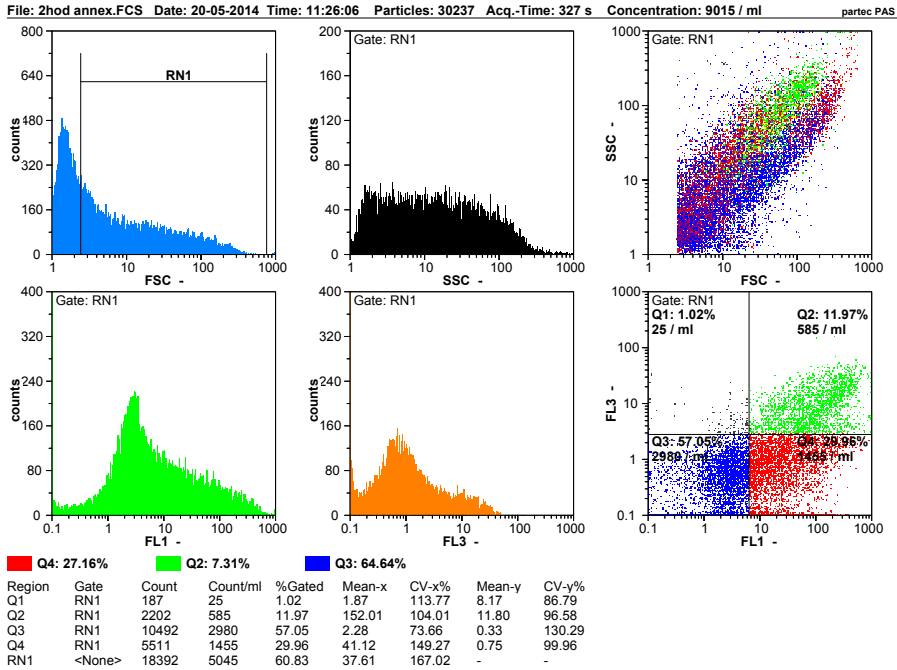

timepoint 20 min plumbagin treatment

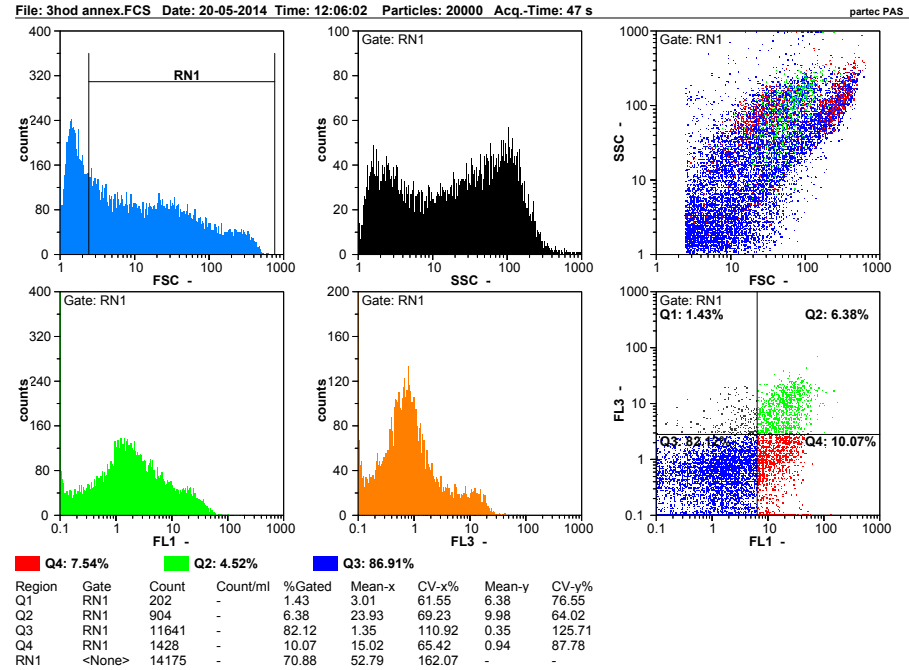

timepoint 40 min plumbagin treatment

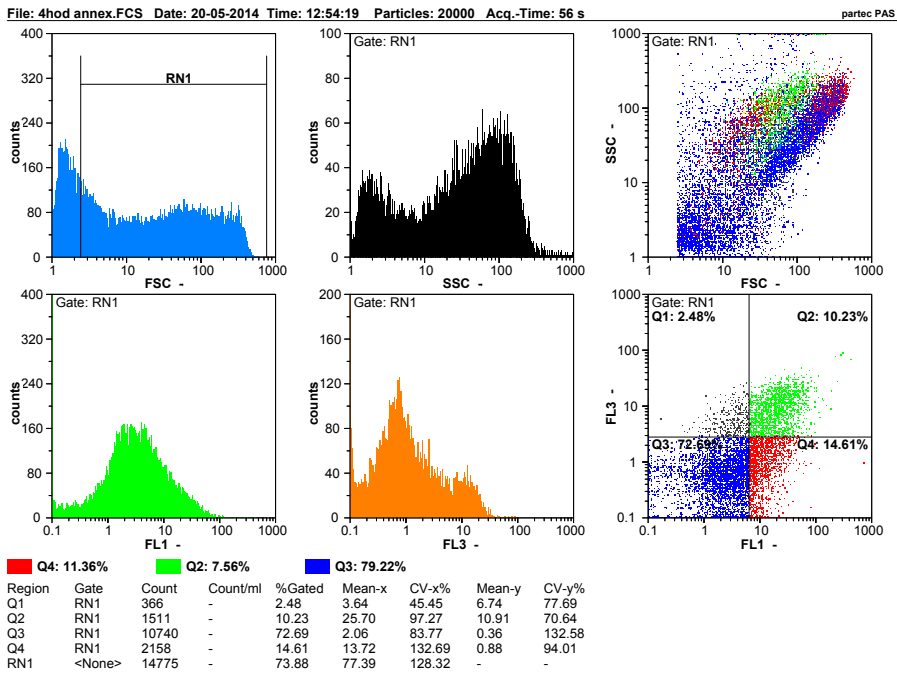

timepoint 90 min plumbagin treatment

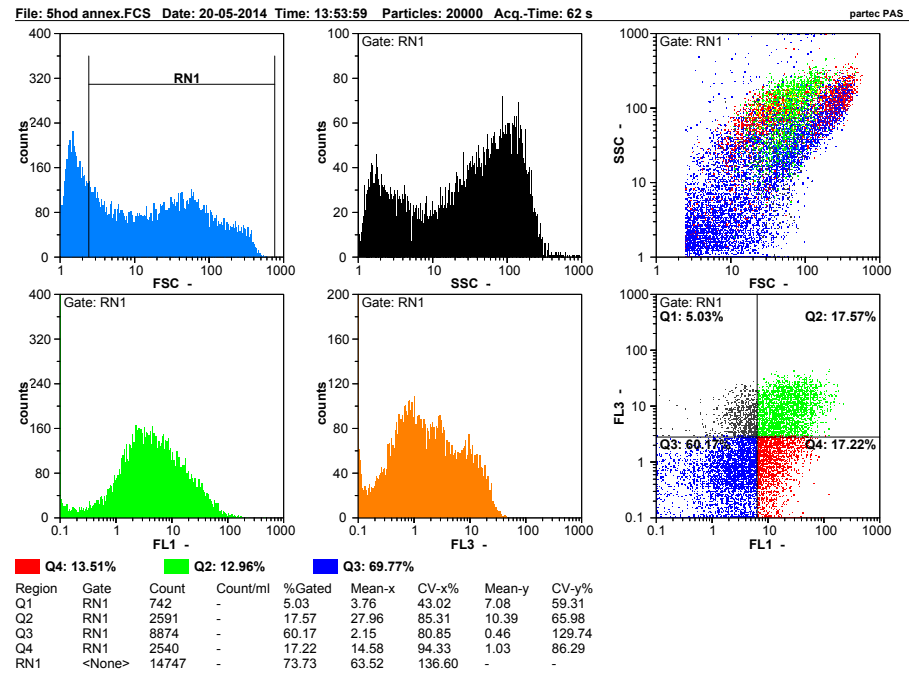

timepoint 6 h plumbagin treatment

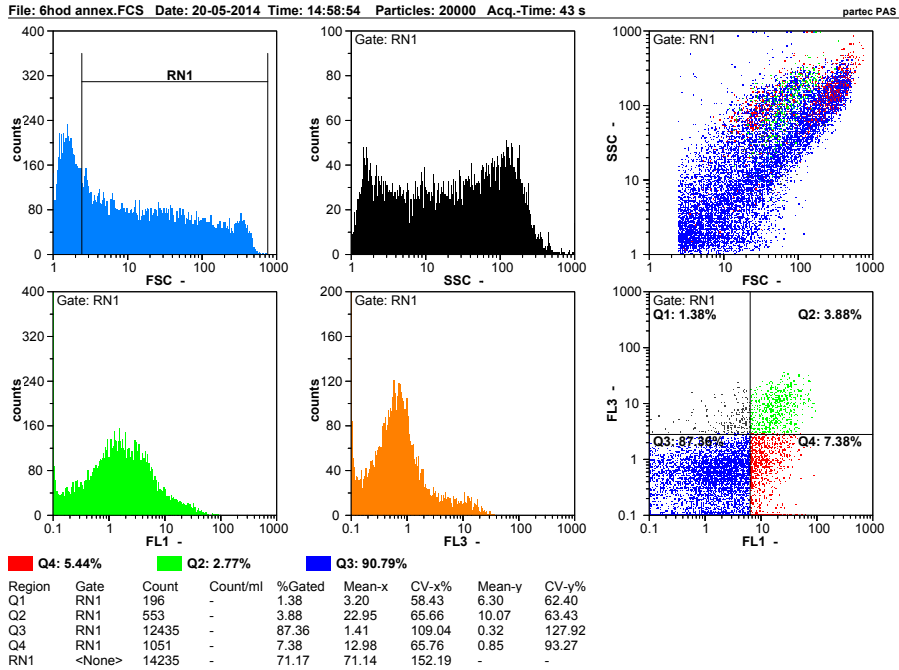

timepoint 7 h plumbagin treatment

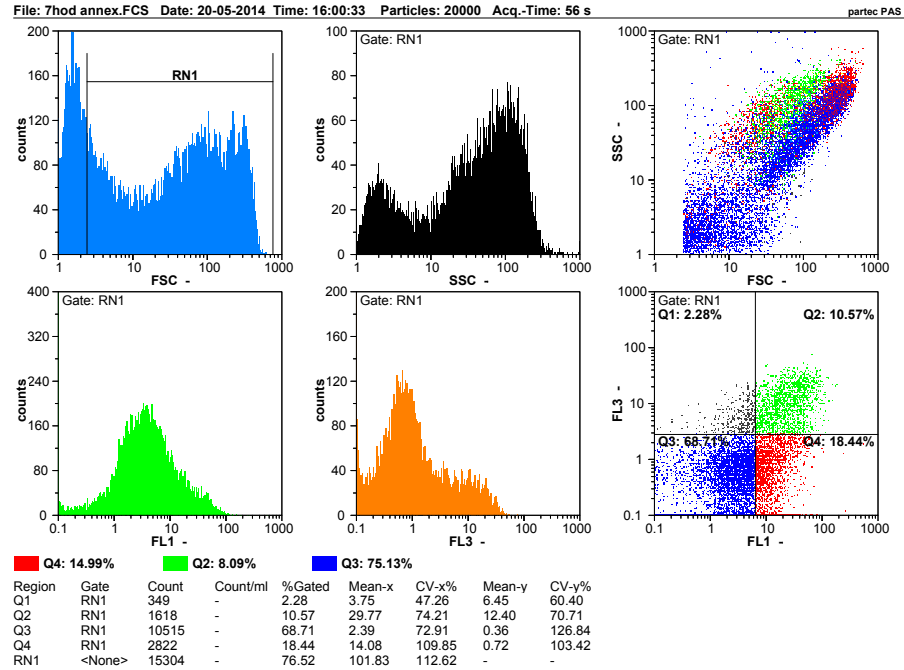

timepoint 9 h plumbagin treatment

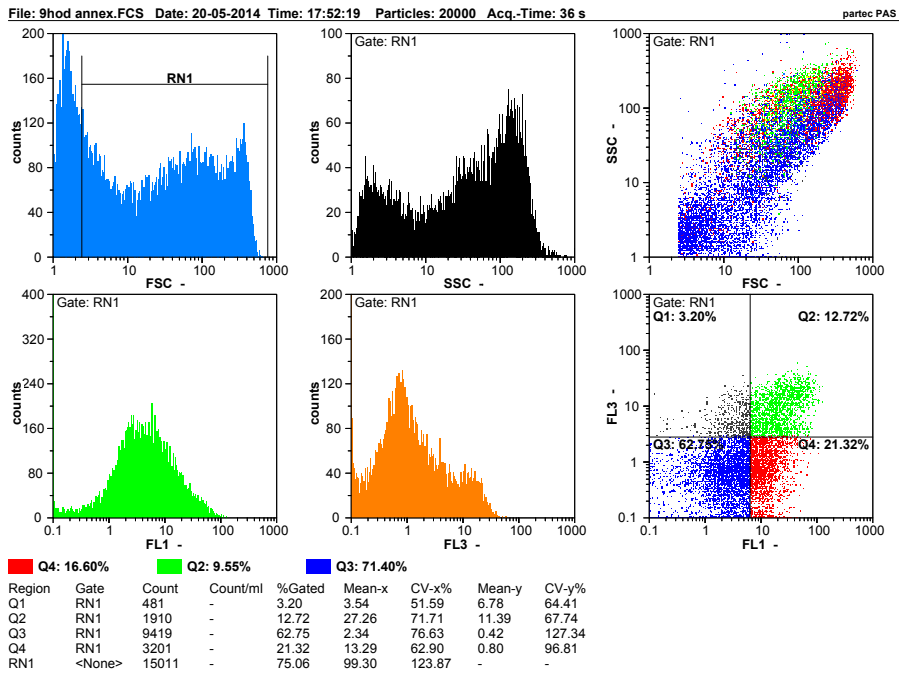

timepoint 11 h plumbagin treatment

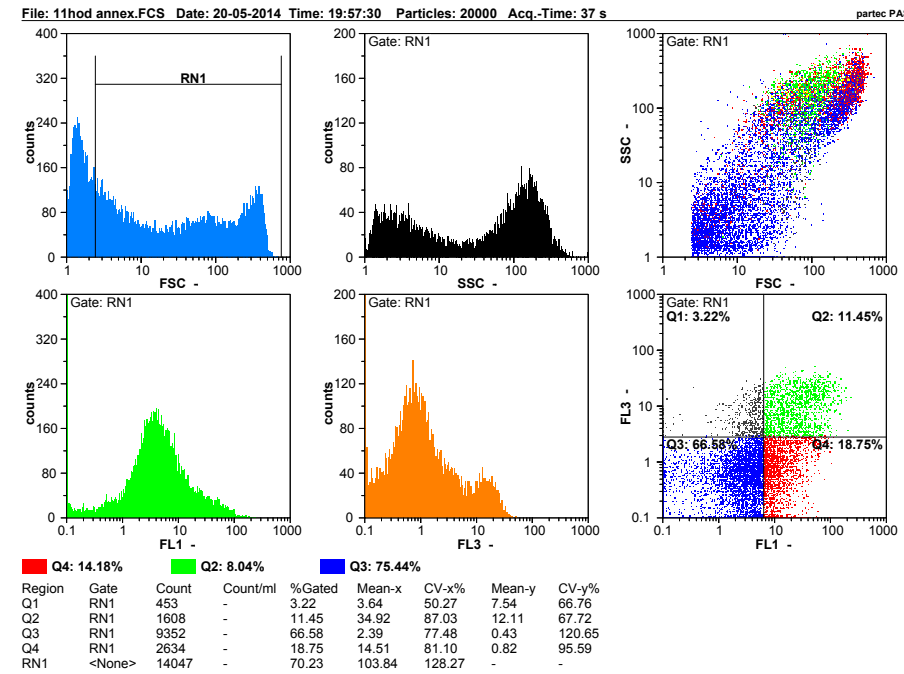



timepoint 13 h plumbagin treatment

File: 13hod annex.FCS Date: 20-05-2014 Time: 21:47:41 Particles: 20000 Acq.-Time: 21 s Concentration: 58025 / ml partec PAS

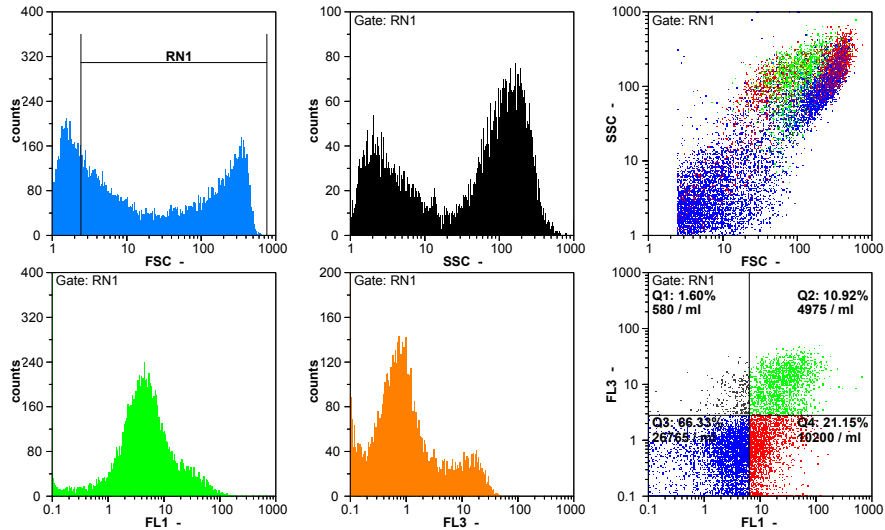

| Region | Gate   | Count | Count/ml | %Gated | Mean-x | CV-x%  | Mean-y | CV-y%  |
|--------|--------|-------|----------|--------|--------|--------|--------|--------|
| Q1     | RN1    | 233   | 580      | 1.60   | 3.77   | 47.86  | 7.40   | 67.11  |
| Q2     | RN1    | 1592  | 4975     | 10.92  | 34.18  | 99.07  | 12.66  | 64.88  |
| Q3     | RN1    | 9672  | 26765    | 66.33  | 2.65   | 71.07  | 0.39   | 118.65 |
| Q4     | RN1    | 3084  | 10200    | 21.15  | 13.89  | 99.36  | 0.74   | 97.73  |
| RN1    | <None> | 14581 | 42520    | 72.91  | 125.68 | 113.59 | -      | -      |

timepoint 28 h plumbagin treatment

File: 28hod annex.FCS Date: 21-05-2014 Time: 13:12:47 Particles: 20000 Acq.-Time: 16 s partec PAS

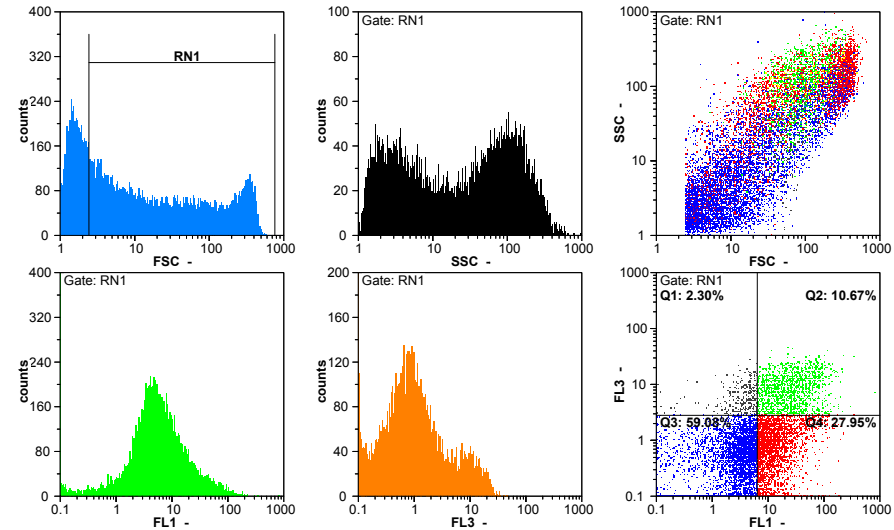

| Region | Gate   | Count | Count/ml | %Gated | Mean-x | CV-x%  | Mean-y | CV-y%  |
|--------|--------|-------|----------|--------|--------|--------|--------|--------|
| Q1     | RN1    | 326   | -        | 2.30   | 3.63   | 50.36  | 6.83   | 58.26  |
| Q2     | RN1    | 1511  | -        | 10.67  | 36.23  | 107.65 | 9.85   | 62.42  |
| Q3     | RN1    | 8389  | -        | 59.08  | 2.72   | 71.44  | 0.44   | 120.92 |
| Q4     | RN1    | 3960  | -        | 27.95  | 16.87  | 115.90 | 0.79   | 96.13  |
| RN1    | <None> | 14166 | -        | 70.83  | 86.27  | 140.14 | -      | -      |

timepoint 48 h plumbagin treatment

File: 48hod annex.FCS Date: 22-05-2014 Time: 13:37:54 Particles: 20000 Acq.-Time: 20 s partec PAS

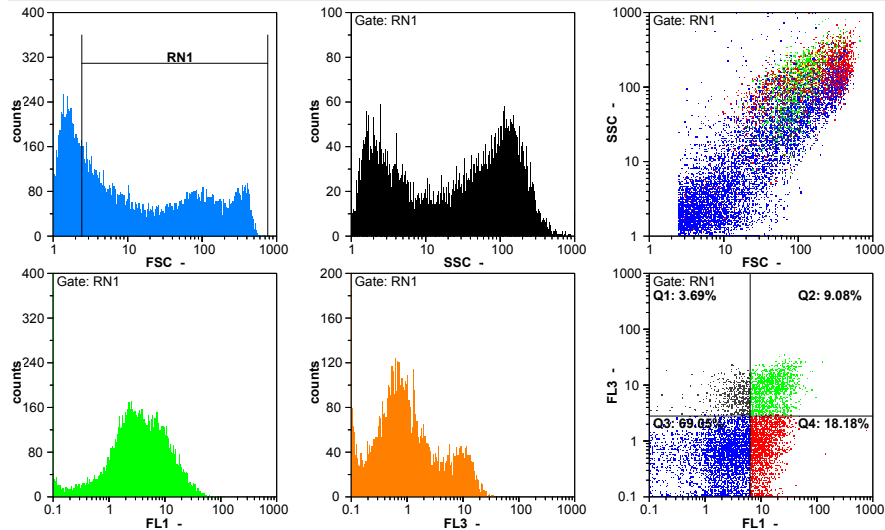

| Region | Gate   | Count | Count/ml | %Gated | Mean-x | CV-x%  | Mean-y | CV-y%  |
|--------|--------|-------|----------|--------|--------|--------|--------|--------|
| Q1     | RN1    | 507   | -        | 3.69   | 3.55   | 50.52  | 7.05   | 53.06  |
| Q2     | RN1    | 1247  | -        | 9.08   | 18.18  | 61.45  | 9.63   | 55.30  |
| Q3     | RN1    | 9482  | -        | 69.05  | 2.07   | 84.39  | 0.38   | 128.12 |
| Q4     | RN1    | 2497  | -        | 18.18  | 12.31  | 136.98 | 0.82   | 90.13  |
| RN1    | <None> | 13733 | -        | 68.67  | 89.54  | 137.42 | -      | -      |

timepoint 0 h plumbagin treatment

File: 0h1.FCS Date: 11-11-2014 Time: 12:05:45 Particles: 20000 Acq.-Time: 23 s partec PAS

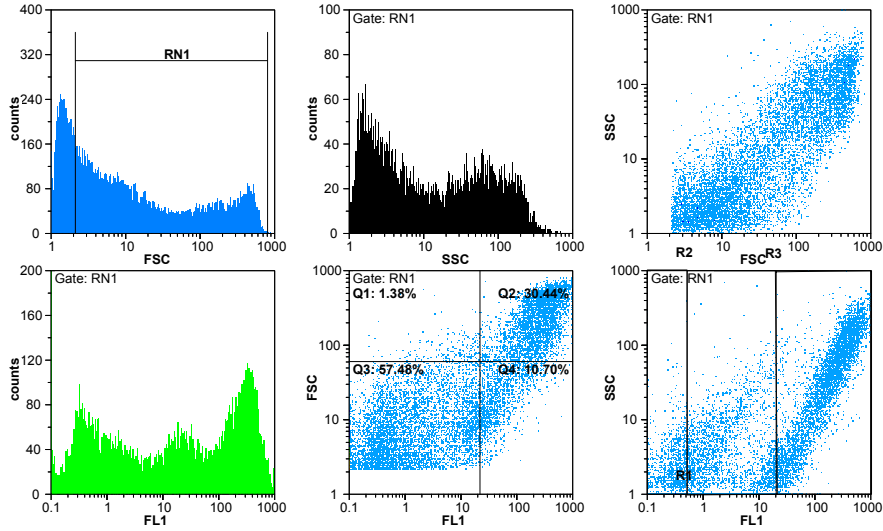

| Region | Gate   | Count | Count/ml | %Gated | Mean-x | CV-x%  | Mean-y | CV-y%  |
|--------|--------|-------|----------|--------|--------|--------|--------|--------|
| Q1     | RN1    | 201   | -        | 1.38   | 8.99   | 73.56  | 102.54 | 62.69  |
| Q2     | RN1    | 4421  | -        | 30.44  | 311.31 | 60.24  | 282.83 | 58.43  |
| Q3     | RN1    | 8350  | -        | 57.48  | 2.92   | 173.88 | 9.40   | 105.50 |
| Q4     | RN1    | 1554  | -        | 10.70  | 73.66  | 107.08 | 25.24  | 63.84  |
| R1     | RN1    | 4186  | -        | 28.82  | 0.20   | 64.03  | 2.63   | 426.06 |
| R2     | RN1    | 4302  | -        | 29.62  | 5.57   | 105.23 | 5.16   | 364.97 |
| R3     | RN1    | 6047  | -        | 41.63  | 246.78 | 79.58  | 70.87  | 110.69 |
| RN1    | <None> | 14526 | -        | 72.63  | 95.60  | 161.79 | -      | -      |

timepoint 40 min plumbagin treatment

File: N40min\_Syto\_30f3.FCS Date: 03-11-2014 Time: 10:59:46 Particles: 20000 Acq.-Time: 40 s Concentration: 79945 / ml partec PAS

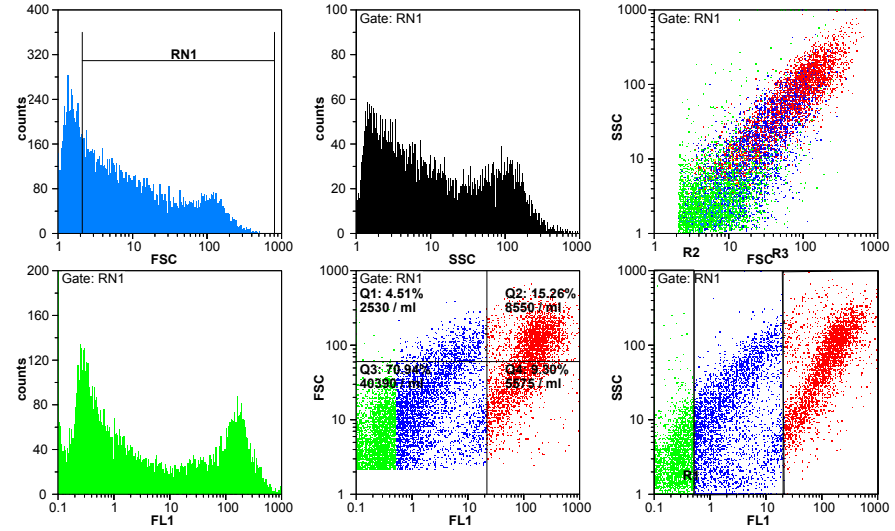

R3: 17.79%    R1: 62.63%    R2: 19.56%

| Region | Gate   | Count | Count/ml | %Gated | Mean-x | CV-x%  | Mean-y | CV-y%  |
|--------|--------|-------|----------|--------|--------|--------|--------|--------|
| Q1     | RN1    | 646   | 2530     | 4.51   | 6.89   | 81.57  | 105.75 | 44.42  |
| Q2     | RN1    | 2188  | 8550     | 15.26  | 208.17 | 64.18  | 145.09 | 53.28  |
| Q3     | RN1    | 10171 | 40390    | 70.94  | 1.20   | 249.37 | 10.92  | 105.92 |
| Q4     | RN1    | 1333  | 5575     | 9.30   | 93.83  | 105.05 | 29.01  | 55.96  |
| R1     | RN1    | 7124  | 27585    | 49.69  | 0.19   | 63.06  | 6.34   | 729.19 |
| R2     | RN1    | 3660  | 15205    | 25.53  | 3.97   | 119.74 | 23.62  | 191.88 |
| R3     | RN1    | 3548  | 14225    | 24.75  | 163.80 | 81.60  | 96.71  | 95.27  |
| RN1    | <None> | 14338 | 57045    | 71.69  | 37.35  | 160.98 | -      | -      |

timepoint 90 min plumbagin treatment

File: NNN1.5h\_Syto50f4.FCS Date: 03-11-2014 Time: 11:16:34 Particles: 20000 Acq.-Time: 46 s partec PAS

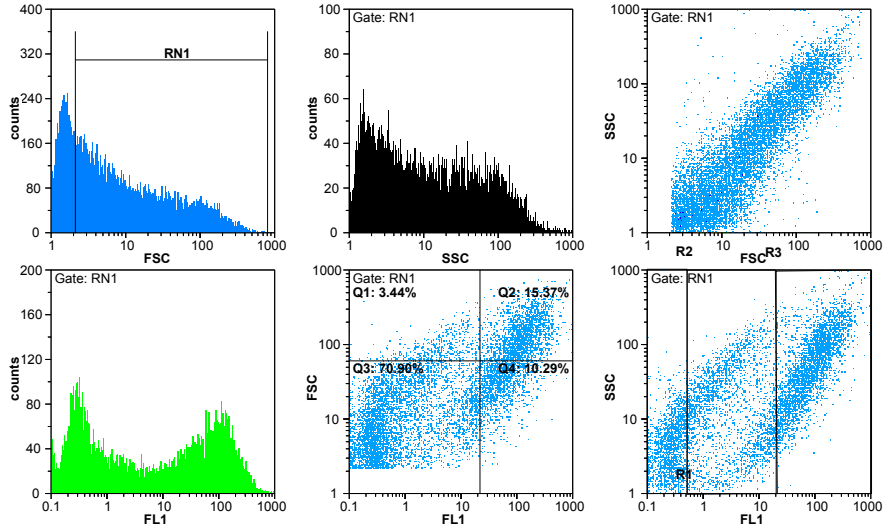

| Region | Gate   | Count | Count/ml | %Gated | Mean-x | CV-x%  | Mean-y | CV-y%  |
|--------|--------|-------|----------|--------|--------|--------|--------|--------|
| Q1     | RN1    | 502   | -        | 3.44   | 5.83   | 97.23  | 107.10 | 50.12  |
| Q2     | RN1    | 2246  | -        | 15.37  | 156.52 | 71.46  | 162.13 | 61.84  |
| Q3     | RN1    | 10358 | -        | 70.90  | 1.42   | 260.58 | 10.39  | 106.21 |
| Q4     | RN1    | 1504  | -        | 10.29  | 68.12  | 84.48  | 32.80  | 44.42  |
| R1     | RN1    | 7874  | -        | 53.89  | 0.16   | 65.79  | 5.52   | 698.39 |
| R2     | RN1    | 2933  | -        | 20.08  | 5.19   | 108.05 | 24.15  | 175.98 |
| R3     | RN1    | 3796  | -        | 25.98  | 119.86 | 86.24  | 87.49  | 110.78 |
| RN1    | <None> | 14610 | -        | 73.05  | 39.35  | 176.56 | -      | -      |

timepoint 4 h plumbagin treatment

File: NNN4h\_Syto50f5super.FCS Date: 03-11-2014 Time: 13:22:50 Particles: 20000 Acq.-Time: 15 s Concentration: 61405 / ml partec PAS

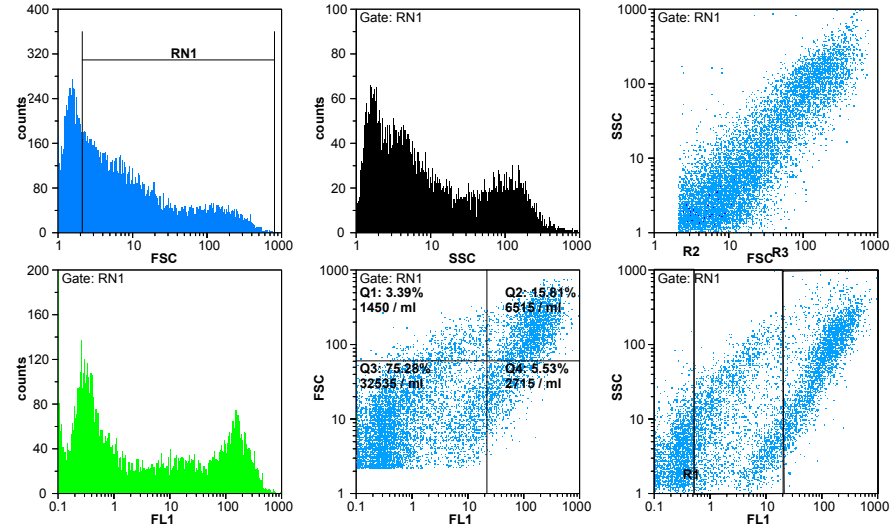

| Region | Gate   | Count | Count/ml | %Gated | Mean-x | CV-x%  | Mean-y | CV-y%  |
|--------|--------|-------|----------|--------|--------|--------|--------|--------|
| Q1     | RN1    | 483   | 1450     | 3.39   | 6.87   | 84.08  | 104.25 | 43.54  |
| Q2     | RN1    | 2251  | 6515     | 15.81  | 179.59 | 62.94  | 197.72 | 59.55  |
| Q3     | RN1    | 10721 | 32535    | 75.28  | 1.35   | 258.49 | 9.85   | 104.39 |
| Q4     | RN1    | 787   | 2715     | 5.53   | 61.50  | 73.29  | 31.76  | 48.44  |
| R1     | RN1    | 8080  | 23845    | 56.73  | 0.18   | 65.40  | 3.38   | 435.93 |
| R2     | RN1    | 3085  | 10005    | 21.86  | 5.03   | 108.64 | 18.82  | 191.15 |
| R3     | RN1    | 3073  | 9355     | 21.58  | 147.55 | 76.40  | 110.89 | 98.96  |
| RN1    | <None> | 14242 | 43215    | 71.21  | 43.96  | 191.66 | -      | -      |

timepoint 6 h plumbagin treatment

File: NNN6h\_syto\_50f3\_hezke.FCS Date: 03-11-2014 Time: 15:27:31 Particles: 20000 Acq.-Time: 8 s partec PAS

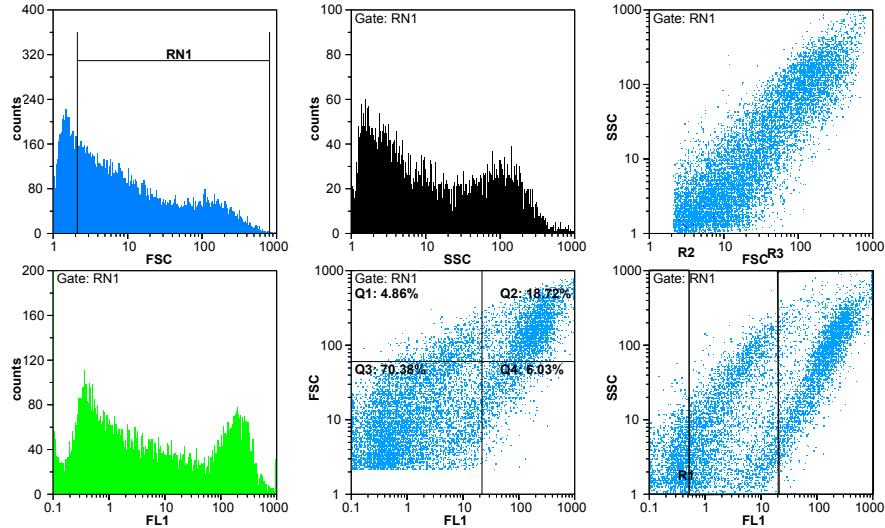

| Region | Gate   | Count | Count/ml | %Gated | Mean-x | CV-x%  | Mean-y | CV-y%  |
|--------|--------|-------|----------|--------|--------|--------|--------|--------|
| Q1     | RN1    | 735   | -        | 4.86   | 7.95   | 70.40  | 101.11 | 40.82  |
| Q2     | RN1    | 2830  | -        | 18.72  | 226.77 | 72.80  | 208.56 | 62.60  |
| Q3     | RN1    | 10639 | -        | 70.38  | 1.73   | 207.92 | 11.17  | 104.78 |
| Q4     | RN1    | 912   | -        | 6.03   | 71.67  | 84.65  | 31.40  | 49.77  |
| R1     | RN1    | 6380  | -        | 42.21  | 0.19   | 68.62  | 2.87   | 217.08 |
| R2     | RN1    | 4940  | -        | 32.68  | 4.44   | 103.45 | 19.51  | 177.02 |
| R3     | RN1    | 3792  | -        | 25.09  | 186.77 | 86.27  | 123.45 | 105.42 |
| RN1    | <None> | 15116 | -        | 75.58  | 53.72  | 179.39 | -      | -      |

timepoint 8 h plumbagin treatment

File: NNN8h\_syto\_2.FCS Date: 03-11-2014 Time: 17:09:31 Particles: 20000 Acq.-Time: 38 s partec PAS

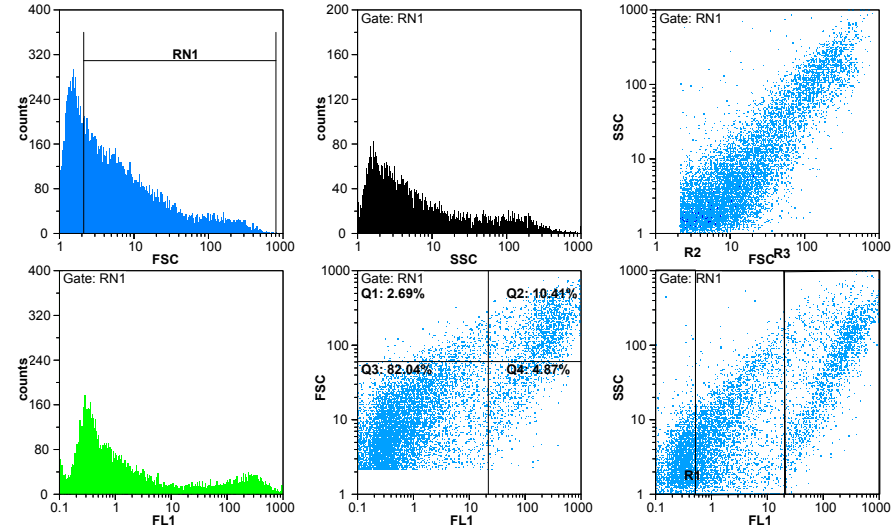

| Region | Gate   | Count | Count/ml | %Gated | Mean-x | CV-x%  | Mean-y | CV-y%  |
|--------|--------|-------|----------|--------|--------|--------|--------|--------|
| Q1     | RN1    | 369   | -        | 2.69   | 7.23   | 82.01  | 101.11 | 43.97  |
| Q2     | RN1    | 1430  | -        | 10.41  | 286.47 | 69.84  | 200.66 | 60.82  |
| Q3     | RN1    | 11273 | -        | 82.04  | 1.03   | 232.79 | 9.89   | 104.34 |
| Q4     | RN1    | 669   | -        | 4.87   | 94.78  | 87.94  | 28.02  | 56.89  |
| R1     | RN1    | 7572  | -        | 55.11  | 0.21   | 59.96  | 4.34   | 662.95 |
| R2     | RN1    | 4048  | -        | 29.46  | 3.01   | 129.59 | 12.40  | 194.26 |
| R3     | RN1    | 2118  | -        | 15.41  | 223.55 | 86.62  | 117.39 | 108.99 |
| RN1    | <None> | 13741 | -        | 68.70  | 33.08  | 217.83 | -      | -      |

timepoint 10 h plumbagin treatment

File: NNN10h\_syto\_002.FCS Date: 03-11-2014 Time: 19:19:49 Particles: 20000 Acq.-Time: 21 s partec PAS

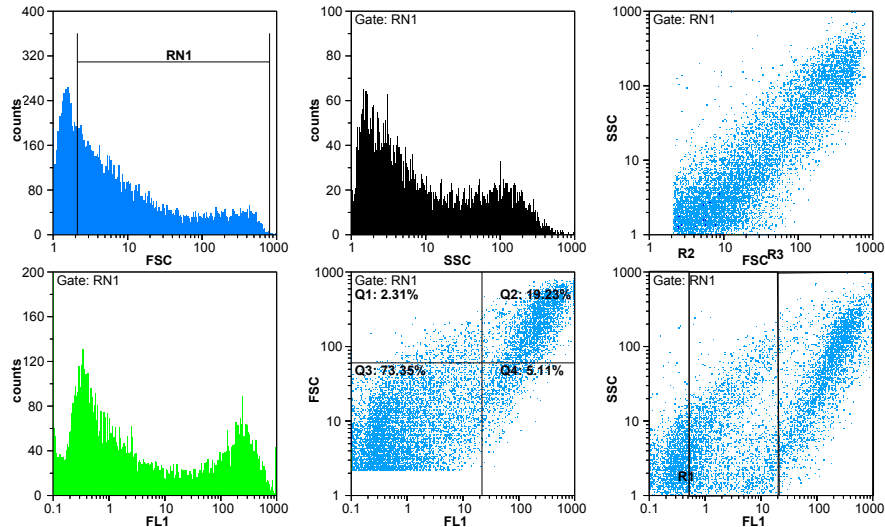

| Region | Gate   | Count | Count/ml | %Gated | Mean-x | CV-x%  | Mean-y | CV-y%  |
|--------|--------|-------|----------|--------|--------|--------|--------|--------|
| Q1     | RN1    | 326   | -        | 2.31   | 7.24   | 79.73  | 97.87  | 37.89  |
| Q2     | RN1    | 2711  | -        | 19.23  | 275.90 | 69.71  | 273.72 | 59.26  |
| Q3     | RN1    | 10341 | -        | 73.35  | 1.38   | 224.54 | 9.63   | 104.92 |
| Q4     | RN1    | 721   | -        | 5.11   | 67.74  | 77.06  | 32.37  | 47.49  |
| R1     | RN1    | 6870  | -        | 47.31  | 0.19   | 64.22  | 3.14   | 537.59 |
| R2     | RN1    | 3972  | -        | 28.17  | 7.11   | 120.43 | 9.92   | 210.50 |
| R3     | RN1    | 3455  | -        | 24.51  | 230.77 | 83.39  | 99.74  | 104.39 |
| RN1    | <None> | 14099 | -        | 70.50  | 63.62  | 198.10 | -      | -      |

timepoint 16 h h plumbagin treatment

File: NNN16h\_syto\_004.FCS Date: 04-11-2014 Time: 10:36:02 Particles: 20000 Acq.-Time: 64 s partec PAS

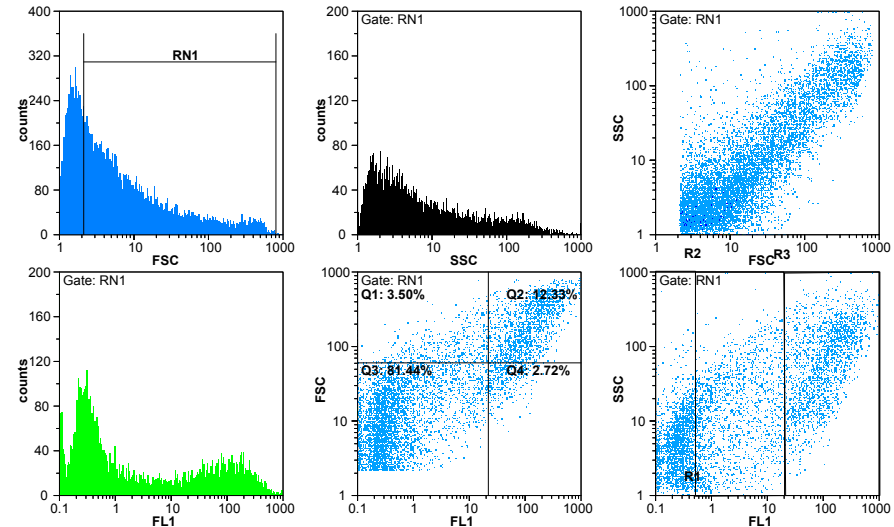

| Region | Gate   | Count | Count/ml | %Gated | Mean-x | CV-x%  | Mean-y | CV-y%  |
|--------|--------|-------|----------|--------|--------|--------|--------|--------|
| Q1     | RN1    | 475   | -        | 3.50   | 6.52   | 95.45  | 120.79 | 64.05  |
| Q2     | RN1    | 1675  | -        | 12.33  | 176.84 | 85.21  | 265.42 | 64.18  |
| Q3     | RN1    | 11061 | -        | 81.44  | 0.65   | 336.02 | 10.08  | 107.52 |
| Q4     | RN1    | 370   | -        | 2.72   | 52.80  | 61.20  | 38.44  | 35.37  |
| R1     | RN1    | 9569  | -        | 70.46  | 0.15   | 65.88  | 5.63   | 519.45 |
| R2     | RN1    | 1953  | -        | 14.38  | 4.37   | 118.49 | 26.62  | 208.93 |
| R3     | RN1    | 2057  | -        | 15.15  | 153.62 | 94.43  | 108.34 | 107.06 |
| RN1    | <None> | 13581 | -        | 67.91  | 46.21  | 227.71 | -      | -      |

timepoint 20 h plumbagin treatment

File: NNN20h\_syto\_005.FCS Date: 04-11-2014 Time: 11:52:21 Particles: 20000 Acq.-Time: 16 s partec PAS

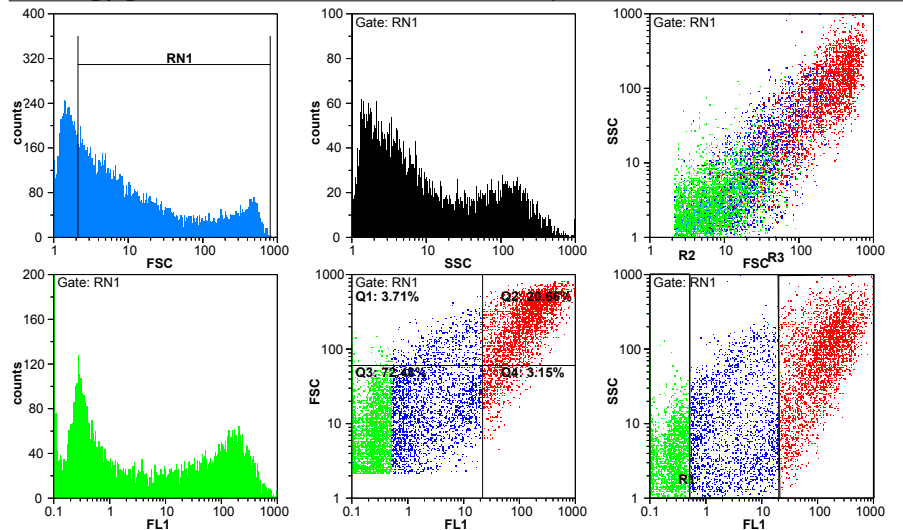

R3: 17.51% R1: 67.59% R2: 14.89%

| Region | Gate   | Count | Count/ml | %Gated | Mean-x | CV-x%  | Mean-y | CV-y%  |
|--------|--------|-------|----------|--------|--------|--------|--------|--------|
| Q1     | RN1    | 539   | -        | 3.71   | 6.59   | 93.43  | 122.94 | 53.84  |
| Q2     | RN1    | 2999  | -        | 20.66  | 191.15 | 78.23  | 314.73 | 54.78  |
| Q3     | RN1    | 10524 | -        | 72.48  | 1.07   | 284.88 | 10.44  | 103.62 |
| Q4     | RN1    | 457   | -        | 3.15   | 46.77  | 60.66  | 35.55  | 40.08  |
| R1     | RN1    | 8399  | -        | 57.85  | 0.17   | 66.06  | 3.20   | 218.83 |
| R2     | RN1    | 2627  | -        | 18.09  | 4.80   | 111.43 | 19.46  | 237.55 |
| R3     | RN1    | 3491  | -        | 24.04  | 170.53 | 86.80  | 125.83 | 102.72 |
| RN1    | <None> | 14519 | -        | 72.59  | 78.26  | 186.97 | -      | -      |

timepoint 24 h plumbagin treatment

File: NNN24h\_syto\_1.FCS Date: 04-11-2014 Time: 09:21:32 Particles: 20000 Acq.-Time: 10 s partec PAS

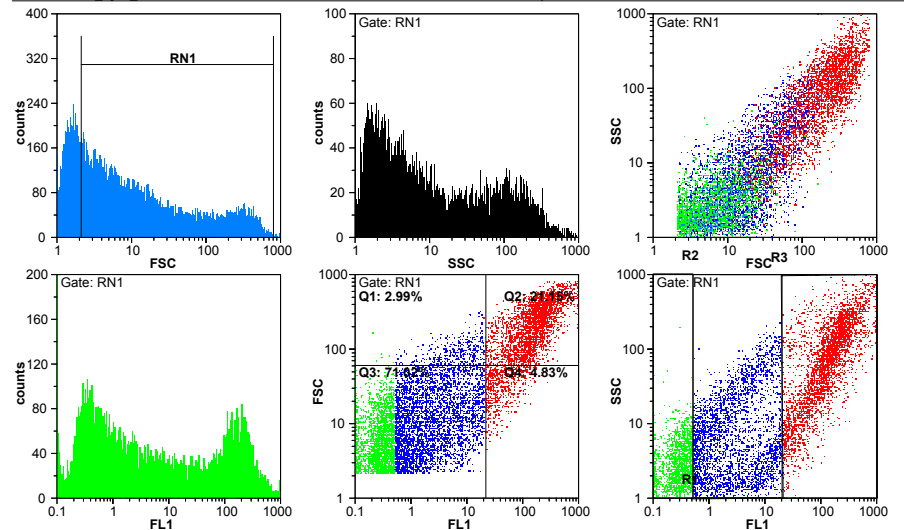

R3: 19.80% R1: 53.49% R2: 26.70%

| Region | Gate   | Count | Count/ml | %Gated | Mean-x | CV-x%  | Mean-y | CV-y%  |
|--------|--------|-------|----------|--------|--------|--------|--------|--------|
| Q1     | RN1    | 450   | -        | 2.99   | 8.62   | 69.26  | 98.91  | 41.23  |
| Q2     | RN1    | 3183  | -        | 21.15  | 209.88 | 75.22  | 262.24 | 59.96  |
| Q3     | RN1    | 10687 | -        | 71.02  | 1.72   | 205.56 | 10.65  | 102.36 |
| Q4     | RN1    | 727   | -        | 4.83   | 53.89  | 71.15  | 35.46  | 40.71  |
| R1     | RN1    | 6396  | -        | 42.51  | 0.19   | 67.41  | 2.51   | 154.30 |
| R2     | RN1    | 4713  | -        | 31.32  | 4.34   | 112.47 | 11.26  | 190.22 |
| R3     | RN1    | 3935  | -        | 26.15  | 179.83 | 86.61  | 123.69 | 106.99 |
| RN1    | <None> | 15047 | -        | 75.23  | 67.71  | 185.46 | -      | -      |

timepoint 36 h plumbagin treatment

File: NNN36h\_syto\_002.FCS Date: 04-11-2014 Time: 21:33:44 Particles: 20000 Acq.-Time: 22 s partec PAS

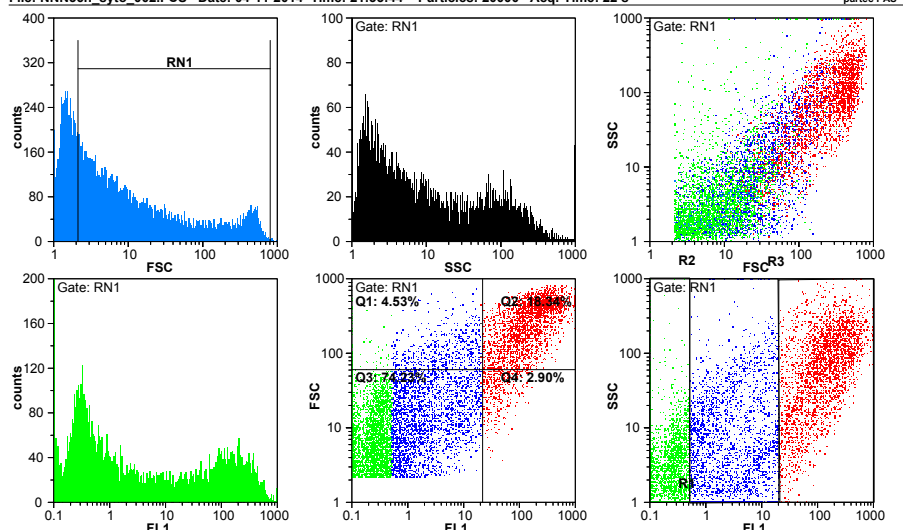

R3: 15.13% R1: 67.88% R2: 16.98%

| Region | Gate   | Count | Count/ml | %Gated | Mean-x | CV-x%  | Mean-y | CV-y%  |
|--------|--------|-------|----------|--------|--------|--------|--------|--------|
| Q1     | RN1    | 636   | -        | 4.53   | 5.96   | 101.04 | 136.50 | 71.66  |
| Q2     | RN1    | 2573  | -        | 18.34  | 206.46 | 79.57  | 319.24 | 55.12  |
| Q3     | RN1    | 10416 | -        | 74.23  | 1.05   | 270.56 | 10.85  | 106.96 |
| Q4     | RN1    | 407   | -        | 2.90   | 49.56  | 56.50  | 35.87  | 41.74  |
| R1     | RN1    | 8006  | -        | 57.06  | 0.17   | 66.37  | 7.42   | 741.00 |
| R2     | RN1    | 3014  | -        | 21.48  | 4.20   | 116.66 | 22.00  | 385.57 |
| R3     | RN1    | 3009  | -        | 21.44  | 183.44 | 88.44  | 108.05 | 108.48 |
| RN1    | <None> | 14032 | -        | 70.16  | 73.82  | 193.60 | -      | -      |

timepoint 48 h plumbagin treatment

File: NNN48h\_syto\_004000.FCS Date: 05-11-2014 Time: 09:44:28 Particles: 20000 Acq.-Time: 78 s partec PAS

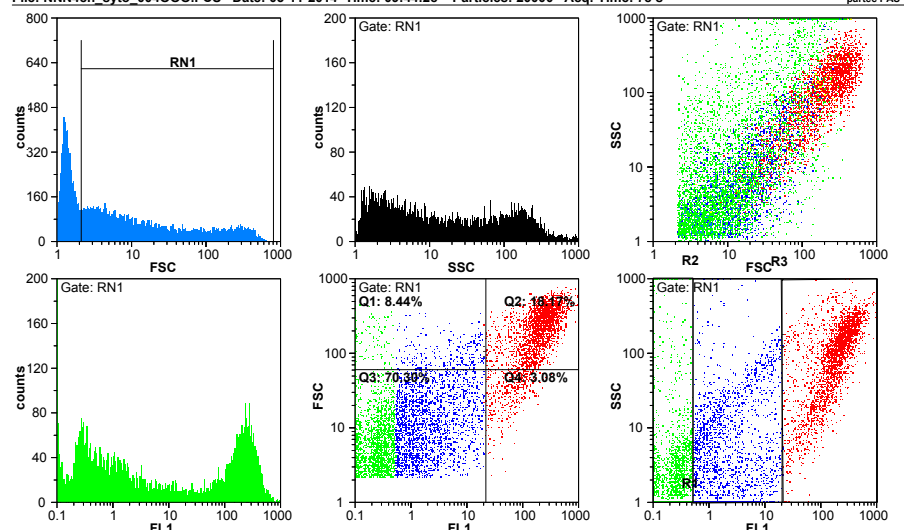

R3: 14.09% R1: 70.38% R2: 15.51%

| Region | Gate   | Count | Count/ml | %Gated | Mean-x | CV-x%  | Mean-y | CV-y%  |
|--------|--------|-------|----------|--------|--------|--------|--------|--------|
| Q1     | RN1    | 1115  | -        | 8.44   | 1.78   | 238.65 | 128.60 | 53.24  |
| Q2     | RN1    | 2399  | -        | 18.17  | 241.94 | 54.81  | 264.77 | 51.07  |
| Q3     | RN1    | 9283  | -        | 70.30  | 0.84   | 273.20 | 11.73  | 103.17 |
| Q4     | RN1    | 407   | -        | 3.08   | 75.43  | 60.02  | 34.32  | 43.46  |
| R1     | RN1    | 8070  | -        | 61.12  | 0.14   | 65.80  | 48.53  | 329.24 |
| R2     | RN1    | 2317  | -        | 17.55  | 3.63   | 119.25 | 19.53  | 389.33 |
| R3     | RN1    | 2815  | -        | 21.32  | 217.16 | 63.20  | 138.71 | 84.82  |
| RN1    | <None> | 13204 | -        | 66.02  | 68.27  | 169.77 | -      | -      |
